# Supplementary material for: Characterization and Phylogenetic Analysis of the Mitochondrial Genome of Glarea lozoyensis Indicates High Diversity within the Order Helotiales
Source: PubMed Central journal article supplement (PMC3783487; doi:10.1371/journal.pone.0074792), 2013-09-25

**A***G. lozoyensis* mt DNA vs *P. subalpina* mt DNA, BLASTN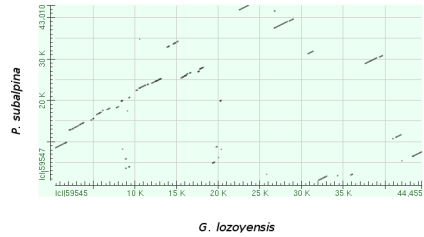**B***G. lozoyensis* mt DNA vs *S. sclerotinia* mt DNA, BLASTN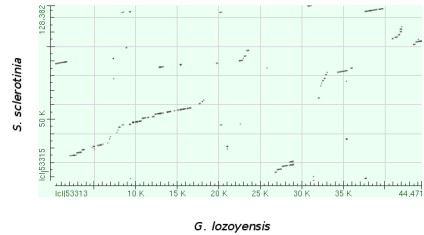

Supplement: pone.0074792.s001.pdf [file pone.0074792.s001.pdf]
