# Supplementary material for: Characterization and Phylogenetic Analysis of the Mitochondrial Genome of Glarea lozoyensis Indicates High Diversity within the Order Helotiales
Source: PubMed Central journal article supplement (PMC3783487; doi:10.1371/journal.pone.0074792), 2013-09-25

**A**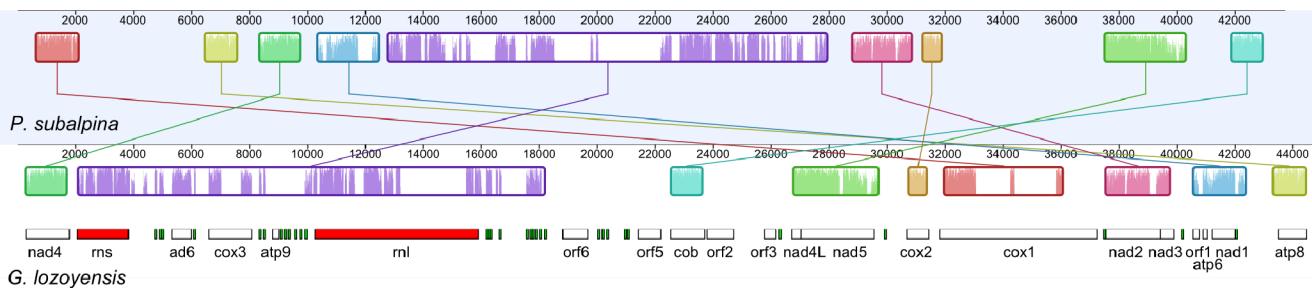**B**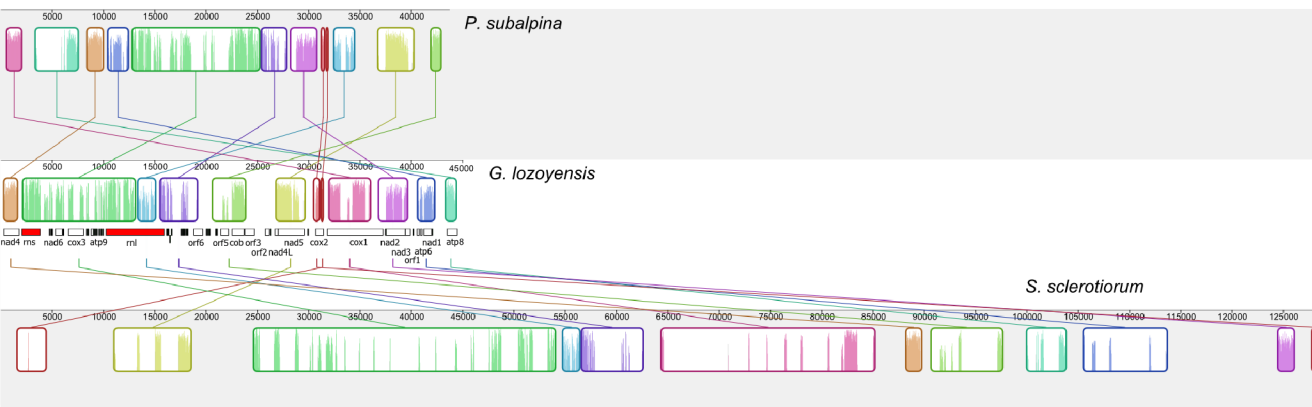

Supplement: pone.0074792.s002.pdf [file pone.0074792.s002.pdf]
